# Supplementary material
Source: publisher figshare collection journal article supplement (https://sage.figshare.com/ndownloader/files/21715383)
Supplement: Supplementary file 1 [file 21715383]

## St Joseph's Treatment Options Clinical Pathway (July 20/18)

| Kidney Function                  | Learn About                                                                                                                                                                                                                                                                                                                                      | Decide                                                                                                                                                                                                                   | Tools/Resources to utilize                                                                                                                                                                                                                                                                                                  | Comments                                                                                                                                                                                                                                                                                                             |
|----------------------------------|--------------------------------------------------------------------------------------------------------------------------------------------------------------------------------------------------------------------------------------------------------------------------------------------------------------------------------------------------|--------------------------------------------------------------------------------------------------------------------------------------------------------------------------------------------------------------------------|-----------------------------------------------------------------------------------------------------------------------------------------------------------------------------------------------------------------------------------------------------------------------------------------------------------------------------|----------------------------------------------------------------------------------------------------------------------------------------------------------------------------------------------------------------------------------------------------------------------------------------------------------------------|
| 26-30%<br>And/or<br>KFRE<br>>10% | <ul style="list-style-type: none"> <li>What kidneys do</li> <li>How to slow progression</li> <li>Members of Kidney Care Team</li> <li>MCKC Nurses explain purpose of clinic &amp; encourage intake apt</li> <li>Intro to advanced care planning, POA and document in Dovetail</li> <li>Vaccinations</li> <li>Introduce "Goal setting"</li> </ul> | <ul style="list-style-type: none"> <li>Decide, with nephrologist, "Plan of Care": (stable, declining, education/decision support, conservative care) and document</li> <li>At each clinic visit, update above</li> </ul> | <ul style="list-style-type: none"> <li>Booklets (Kidney Foundation Book 1)</li> <li>St Jos MCKC Entry Bag: refer to Nursing MCKC Initial Appointment outline</li> <li>Complete "I would like to know more about" form &amp; discuss with team</li> </ul>                                                                    | <p>Ask: "What does patient know about why they are at MCKC clinic, cause of kidney disease &amp; progression of kidney disease"</p> <p>Use "dialysis" &amp; "transplant" words as well as standard key points</p> <p>Answer lifestyle questions (smoking, etc.)</p> <p>Is patient followed by other specialists?</p> |
| 21-25%<br>And/Or<br>KFRE<br>>25% | <ul style="list-style-type: none"> <li>Symptoms to watch for as function declines</li> <li>Treatment Options</li> <li>Vein preservation</li> <li>Continued education on slowing progression of kidney disease &amp; symptom management</li> </ul>                                                                                                | <ul style="list-style-type: none"> <li>Advocate for earlier treatment options</li> </ul>                                                                                                                                 | <ul style="list-style-type: none"> <li>Tools as above</li> <li>St Jos Laminated pictures</li> <li>Explore Transplant package/TAP, Your Kidney Transplant booklet, "When you are thinking about Donating a Kidney" booklet, Donor hotline card, donor website, if appropriate</li> <li>Flipcharts, if appropriate</li> </ul> | <p>Introduce &amp; prepare patient for the concept &amp; purpose of education</p>                                                                                                                                                                                                                                    |

| <b>Kidney Function</b>         | <b>Learn About</b>                                                                                                                                                                                    | <b>Decide</b>                                                                                                                                                                                                                                                                                                          | <b>Tools to utilize</b>                                                                                                                                                                                                                                                                                                                                                                                                                                                                                                                                                                                                                                                 | <b>Comments</b>                                                                                                                                                                                                                                                                                                                                       |
|--------------------------------|-------------------------------------------------------------------------------------------------------------------------------------------------------------------------------------------------------|------------------------------------------------------------------------------------------------------------------------------------------------------------------------------------------------------------------------------------------------------------------------------------------------------------------------|-------------------------------------------------------------------------------------------------------------------------------------------------------------------------------------------------------------------------------------------------------------------------------------------------------------------------------------------------------------------------------------------------------------------------------------------------------------------------------------------------------------------------------------------------------------------------------------------------------------------------------------------------------------------------|-------------------------------------------------------------------------------------------------------------------------------------------------------------------------------------------------------------------------------------------------------------------------------------------------------------------------------------------------------|
| 16-20%<br>And/or<br>KFRE > 30% | <ul style="list-style-type: none"> <li>• Treatment Options</li> <li>• Dialysis Access</li> <li>• Transplant information</li> <li>• Transplant workup if preemptive/ living donor</li> </ul>           | <ul style="list-style-type: none"> <li>• Treatment option decision</li> <li>• Update 'Plan of Care' &amp; follow appropriate pathway including supports available (ie Supportive Care Plan, PD insertion, transplant or HD)</li> <li>• Dialysis Access: identify preferred access &amp; refer appropriately</li> </ul> | <p>Referred for modality education (Navigator)</p> <ul style="list-style-type: none"> <li>• Kidney Foundation Book 2</li> <li>• St Jos-Laminated pictures</li> <li>• CAPD bag, PD catheter, CVC, Access to Transplant package/video</li> <li>• Unit tours, unit videos, linkage to home programs &amp; home patient peer support</li> <li>• SHERPA table of treatment option comparisons</li> <li>• Dialysis Snapshot website, <a href="http://www.kidneycampus.ca">www.kidneycampus.ca</a></li> </ul> <p>Decision Support tools</p> <ul style="list-style-type: none"> <li>• Sherpa, Use Step 2 (3rd page of Pt Decision Aid)</li> <li>• Confirm Next Steps</li> </ul> | <p>Minimum of 3 touchpoints re treatment option education, between MCKC &amp; Nurse Navigator:</p> <ol style="list-style-type: none"> <li>1. Introduction</li> <li>2. Treatment Option Education</li> <li>3. Follow up in clinic &amp; document decision</li> <li>4. Re-refer undecided patients to Navigator for additional 1:1 education</li> </ol> |
| 11-15%<br>and/or<br>KFRE > 30% | <ul style="list-style-type: none"> <li>• Access creation/ insertion</li> <li>• Pre-Transplant &amp; Transplant workup</li> <li>• Discussion of Implications of not having a "Plan of Care"</li> </ul> | <ul style="list-style-type: none"> <li>• As Above</li> </ul>                                                                                                                                                                                                                                                           | <ul style="list-style-type: none"> <li>• As Above</li> <li>• Refresher education as appropriate or if significant time has passed since previous education occurred</li> <li>• Reaffirm dialysis decision</li> </ul>                                                                                                                                                                                                                                                                                                                                                                                                                                                    | As above                                                                                                                                                                                                                                                                                                                                              |
| eGFR<10%                       | <ul style="list-style-type: none"> <li>• Monitor symptoms to suggest dialysis is needed</li> <li>• Assess &amp; maintain access</li> </ul>                                                            | <ul style="list-style-type: none"> <li>• As Above</li> </ul>                                                                                                                                                                                                                                                           | <ul style="list-style-type: none"> <li>• As above</li> <li>• Monitor more closely</li> </ul>                                                                                                                                                                                                                                                                                                                                                                                                                                                                                                                                                                            | As above                                                                                                                                                                                                                                                                                                                                              |

Clinical Pathway based on the ORN Kidney Care Journey, KFRE: Kidney Failure Risk Equation

- Treatment Options include Transplant, Independent or Assisted Peritoneal Dialysis (PD), Independent or Assisted Home Hemodialysis (HHD), In-Center hemodialysis (ICHD) and Supportive Care
- If patient is new to MCKC clinic & rapidly declining in kidney function, a MCKC nurse will be assigned as the Primary Nurse for coordinating care with the Nurse Navigator to expedite treatment option education
- MCKC nurses to ask nephrologist if it's ok to start the modality education conversation in advance re any contraindications re one specific modality. If Supportive Care chosen, follow "Supportive Care Plan"
